# Supplementary material
Source: publisher figshare collection journal article supplement (https://asha.figshare.com/ndownloader/files/16531643)
Supplement: Supplementary file 1 [file 16531643]

## Supplemental Material S1.

Our previous studies of Enhanced Conversational Recast treatment have used a different metric for treatment response: a cut-off of  $d > 1.0$  (Eidsvåg et al., 2019; Meyers-Denman & Plante, 2016; Plante et al., 2014; Plante et al., 2018). However, after reviewing the aggregated data from this and the previous studies, we believe that this criterion is no longer sufficient to classify children as treatment responders. A few children who would be classified as treatment responders based on our previous criteria of  $d > 1.0$  appear functionally dissimilar from other clear responders (e.g., child S8 in Figure 3)

Table 1S. Number of treatment responders under different classification criteria across studies that have included Enhanced Conversational Recast treatment.

| Study                                      | <i>N</i> Responders<br>( $d \geq 1.0$ ) | <i>N</i> Responders<br>( $d \geq 1.0$ & One Session $\geq$<br>50% Accuracy) |
|--------------------------------------------|-----------------------------------------|-----------------------------------------------------------------------------|
| Eidsvåg et al. (in press) <sup>1</sup>     | 19 (68%)                                | 18 (64%)                                                                    |
| Meyers-Denman & Plante (2016) <sup>1</sup> | 12 (75%)                                | 12 (75%)                                                                    |
| Plante et al. (2014) <sup>3</sup>          | 6 (75%)                                 | 6 (75%)                                                                     |
| Plante et al. (2018) <sup>1</sup>          | 19 (68%)                                | 18 (64%)                                                                    |
| Plante et al. (present paper) <sup>2</sup> | 16 (80%)                                | 15 (75%)                                                                    |

1.  $d \geq 1.0$  originally reported for these studies.

2.  $d \geq 1.0$  plus  $\geq 50\%$  accuracy criteria used for this study.

3. Only half of the children receive the high variability input aspect of Enhanced Conversational Recast and clinician cueing of child attention was encouraged, but not required for all children.

**Note:** The  $d = 1.0$  criterion assures that a change from baseline has occurred, even though there may be differences in baseline across children. It also accounts for children who show large treatment responses (change from 0 to 100%) over the last three treatment days. However,  $d$  values of 1.0 from individual children can be obtained with small amounts of change when day-to-day variance in performance is low or non-existent. The additional 50% criterion reflects the concept of clinically meaningful change on top of a change from baseline.

## References

Eidsvåg, S. S., Plante, E., Oglivie, T., Privette, C., & Mailend, M.-L. (2019). Individual versus small group treatment of morphological errors for children with developmental language disorder. *Language, Speech, and Hearing Services in Schools, 50*, 237–252.

Meyers-Denman, C. N., & Plante, E. (2016). Dose schedule and Enhanced Conversational Recast treatment for children with specific language impairment. *Language, Speech, and Hearing Services in Schools, 47*, 334–346.

Plante, E., Oglivie, T., Vance, R., Aguilar, J. M., Dailey, N. S., Meyers, C., . . . Burton, R. (2014). Variability in the language input to children enhances learning in a treatment context. *American Journal of Speech-Language Pathology, 23*, 530–545.

Plante, E., Tucci, A., Nicholas, K., Arizmendi, G. D., & Vance, R. (2018). Effective use of auditory bombardment as a therapy adjunct for children with developmental language disorders. *Language, Speech, and Hearing Services in Schools, 49*(2), 320–333.
